# Supplementary material for: Community-based participatory research in palliative care: a social justice imperative
Source: PubMed Central journal article supplement — Lancet Public Health. Author manuscript; Available in PMC 2022 Jul 7. (PMC9260493; doi:10.1016/s2468-2667(21)00305-4), 2022-02
Supplement: NIHMS1818448-supplement-appendix.pdf [file NIHMS1818448-supplement-appendix.pdf]

# THE LANCET

## Public Health

### **Supplementary appendix**

This appendix formed part of the original submission. We post it as supplied by the authors.

Supplement to: Rosa WE, Elk R, Tucker RO. Community-based participatory research in palliative care: a social justice imperative. *Lancet Public Health* 2022; **7**: e140.

**Table 1. Key Aspects of a CBPR Intensive Training Curriculum for Clinicians and Researchers to Promote Social Justice in Palliative Care.**

| Session Themes                                                                             | Objectives                                                                                                                                                                                                                                                                                                                               |
|--------------------------------------------------------------------------------------------|------------------------------------------------------------------------------------------------------------------------------------------------------------------------------------------------------------------------------------------------------------------------------------------------------------------------------------------|
| Understanding and Experiencing Power Differentials                                         | Interactive exercises to experience and appreciate the power differentials between healthcare professionals and patients and families from underserved communities.                                                                                                                                                                      |
| Recognizing and Experiencing Social Determinants of Health                                 |                                                                                                                                                                                                                                                                                                                                          |
| CBPR: History, Philosophy, Balancing Social Justice and Research                           | Recognizing social action focus of CBPR, the principles of balancing research with the goal of enhancing outcomes for the communities we serve, and full and equal partnership with the community.                                                                                                                                       |
| Developing Partnership with The Community Advisory Board                                   | Principles of appointing, partnering, and developing trust with a Community Advisory Board comprised of members from the community who have experienced disparities in receipt of palliative care, community leaders, and healthcare providers.                                                                                          |
| Focus Groups Principles and Practice                                                       | Focus group principles on recruiting community members from underserved communities, creating a safe place for community members to share their experiences with palliative and end-of-life care, the cultural values and care and communication preferences this community cares about, and their lived experiences of bias and racism. |
| Thematic Analysis                                                                          | Methods for analyzing the key themes that emerge from the focus groups.                                                                                                                                                                                                                                                                  |
| Building the Palliative Care Intervention in Partnership with the Community Advisory Board | In full partnership with the Community Advisory Board, and based on the results from the focus groups, working to design equitable palliative care programs for this community, e.g., developing training programs for palliative care clinicians who provide care for patients from this community.                                     |
| Planning the Next Steps and Sustainability with the Community Advisory Board               | Following the design of the equitable palliative care program, planning with the Community Advisory Board the next steps for the implementation, dissemination, and sustainability of this program.                                                                                                                                      |
